# Supplementary material
Source: publisher figshare collection journal article supplement (https://acs.figshare.com/ndownloader/files/4795384)
Supplement: Supplementary file 1 [file 4795384]

Compound	SMILES	IC50 (µM)a (Recombinant hTDP2)
33	O=C(C1=CC=CC=C1C2)NC2=O	25±8.2
34	O=C(C1=CC=CC(Br)=C1C2)NC2=O	>37
35	O=C(C1=CC=C(Br)C=C1C2)NC2=O	11±8.3
36	O=C(C1=CC=C(I)C=C1C2)NC2=O	7.6±4.1
37	O=C(C1=CC(I)=CC=C1C2)NC2=O	9.8±3.7
38	O=C(C1=C(I)C=CC=C1C2)NC2=O	7.5±3.0
39	O=C(C1=CC=C(C(O)=O)C=C1C2)NC2=O	>111
40	O=C(C1=CC(C(O)=O)=CC=C1C2)NC2=O	3.0±1.0
41	O=C(C1=CC=C(C(F)(F)F)C=C1C2)NC2=O	7.0±1.7
42	O=C(C1=CC=C([N+]([O-])=O)C=C1C2)NC2=O	19±9.5
43	O=C(C1=CC=C(C2=CC=CO2)C=C1C3)NC3=O	10±2.5
44	O=C(C1=CC(C2=CC=CO2)=CC=C1C3)NC3=O	13, 26b
45	O=C(C1=CC=CC(C2=CC=CO2)=C1C3)NC3=O	>111
46	O=C(C1=C(C2)C=C(C3=CC=CO3)C=C1)N(O)C2=O	>111
47	O=C(C1=C(C2)C=CC(C3=CC=CO3)=C1)N(O)C2=O	>111
48	O=C(C1=C(C2)C=C(C3=CC=CC=C3)C=C1)NC2=O	23, 71b
49	O=C(C1=C(C2)C=C(C3=CC=CN=C3)C=C1)NC2=O	16±5.0
50	O=C(C1=C(C2)C=CC(C3=CC=CN=C3)=C1)NC2=O	20±6.0
51	O=C(C1=C(C2)C=C(C3=CC(O)=CC=C3)C=C1)NC2=O	13±3.0
52	O=C(C1=C(C2)C=CC(C3=CC=CC(O)=C3)=C1)NC2=O	15±9.5
53	O=C(C1=C(C2)C=CC=C1C3=CC=CC(O)=C3)NC2=O	26±5.7
54	O=C(C1=C(C2)C=CC(C3=CC=C(O)C=C3)=C1)NC2=O	14±9.2
55	O=C(C1=C(C2)C=C(C3=CC([N+]([O-])=O)=CC=C3)C=C1)NC2=O	10±2.0
56	O=C(C1=C(C2)C=CC(C3=CC=CC([N+]([O-])=O)=C3)=C1)NC2=O	11±4.5
57	O=C(C1=C(C2)C=CC=C1C3=CC=CC([N+]([O-])=O)=C3)NC2=O	19±4.3
58	O=C(C1=C(C2)C(C3=CC([N+]([O-])=O)=CC=C3)=CC=C1)NC2=O	>37
59	O=C(C1=C(C2)C=C(C3=CC(N)=CC=C3)C=C1)NC2=O	42±2.0
60	O=C(C1=C(C2)C=CC(C3=CC=CC(N)=C3)=C1)NC2=O	>111
61	O=C(C1=C(C2)C=C(C3=CC=C(N)C=C3)C=C1)NC2=O	36±3.0
62	O=C(C1=C(C2)C=C(C3=CC(NS(C)(=O)=O)=CC=C3)C=C1)NC2=O	18±8.0
63	O=C(C1=C(C2)C=CC(C3=CC=CC(NS(C)(=O)=O)=C3)=C1)NC2=O	4.5±2.8
64	O=C(C1=C(C2)C=C(C3=CC=C(NS(C)(=O)=O)C=C3)C=C1)NC2=O	1.9±0.90
65	O=C(C1=C(C2)C=C(C3=CC=C(NC(C=C)=O)C=C3)C=C1)NC2=O	10±7.3
66	O=C(C1=C(C2)C=CC(C3=CC=CC(NC(C=C)=O)=C3)=C1)NC2=O	11±3.0
67	O=C(C1=C(C2)C=C(C3=C(C(O)=O)C=CC=C3)C=C1)NC2=O	>111
68	O=C(C1=C(C2)C=C(C3=CC=C(C(O)=O)C=C3)C=C1)NC2=O	30±5.0
69	O=C(C1=C(C2)C=C(C3=CC(C(O)=O)=CC=C3)C=C1)NC2=O	21±8.0
70	O=C(C1=C(C2)C=C(C3=CC(C(N)=O)=CC=C3)C=C1)NC2=O	16±5.8
71	O=C(C1=C(C2)C=C(C3=CC(C(C)=O)=CC=C3)C=C1)NC2=O	5.5±2.0
72	O=C(C1=C(C2)C=C(C3=CC(Cl)=CC=C3)C=C1)NC2=O	5.6±2.6
73	O=C(C1=C(C2)C=CC(C3=CC=CC(Cl)=C3)=C1)NC2=O	1.7±0.30
74	O=C(C1=C(C2)C=C(C3=CC=C(Cl)C=C3)C=C1)NC2=O	6.4±4.2
75	O=C(C1=C(C2)C=C(C3=CC(Br)=CC=C3)C=C1)NC2=O	8.0±5.1
76	O=C(C1=C(C2)C=CC(C3=CC=C(Br)C=C3)=C1)NC2=O	7.1±5.3
77	O=C(C1=C(C2)C=C(C3=C(OC)C=CC=C3OC)C=C1)NC2=O	>37
78	O=C(C1=C(C2)C=C(C3=CC(OC)=CC=C3OC)C=C1)NC2=O	16±6.9
79	O=C(C1=C(C2)C=C(C3=CC(F)=C(OC)C=C3)C=C1)NC2=O	3.0±2.3
80	O=C(C1=C(C2)C=C(C3=CC(Cl)=C(F)C=C3)C=C1)NC2=O	4.1±1.9
81	O=C(C1=C(C2)C=C(C3=CC=C(F)C=C3F)C=C1)NC2=O	4.5±1.5
82	O=C(C1=C(C2)C=C(C3=CC=C(C(F)(F)F)C=C3)C=C1)NC2=O	3.2±2.5
83	O=C(C1=C(C2)C=C(C3=CC(C4=CC=CC=C4)=CC=C3)C=C1)NC2=O	>111
84	O=C(C1=C(C2)C=C(C3=NC(C=CC=C4)=C4S3)C=C1)NC2=O	5.1±2.0
85	O=C(C1=C(C2)C=C(C3=CC(C=CC=C4)=C4N=C3)C=C1)NC2=O	9.3, 6.5b
86	O=C(C1=C(C2)C=C(CC3=CC=CC=C3)C=C1)NC2=O	>111
87	O=C(C1=C(C2)C=C(C(C3=CC=CC([N+]([O-])=O)=C3)=O)C=C1)NC2=O	11±2.0
88	O=C(C1=C(C2)C=CC(C(C3=CC([N+]([O-])=O)=CC=C3)=O)=C1)NC2=O	5.4±1.8
89	O=C(C1=C(C2C(OCC)=O)C=C(Br)C=C1)NC2=O	14±5.3
90	O=C(C1=C(N2)C=C(C3=CC=CC=C3)C=C1)NC2=O	>111
91	O=C(C1=C(C2=CC=C3)C3=C(Br)C=C1)NC2=O	>111
92	O=C(C1=C(C2=CC=C3)C3=C(C4=CC=CO4)C=C1)NC2=O	>111
93	NC1=C2C(CC(NC2=O)=O)=NN1C3=CC=C(F)C=C3	>111
94	NC1=C2C(CC(NC2=O)=O)=NN1C3=CC=CN=C3	>111
95	NC1=C2C(CC(NC2=O)=O)=NN1C3=CC=CC=C3	>111
96	O=C(C1=C(NC(C)=O)N(C2=CC=CC=C2)N=C1C3)NC3=O	>111
